# Supplementary material for: Hazardous air pollutants and breast cancer risk in California teachers: a cohort study
Source: PubMed Central journal article supplement (PMC4417287; doi:10.1186/1476-069x-14-14), 2015-01-30
Supplement: 12940_2014_848_MOESM1_ESM.pdf [file 12940_2014_848_MOESM1_ESM.pdf]

**Supplementary Table S1:** Select information for 24 Mammary Gland Carcinogens examined in the analysis.

| <i>Compound</i>       | <i>Probable Routes of Human Non-Occupational Exposure<sup>a</sup></i>                                                                                                                                                                                                                                                              | <i>Predominant Source Type for NATA-modeled Exposure among Our Study Population<sup>b</sup></i> | <i>IARC Classification<sup>c</sup></i> | <i>Overall Confidence in Exposure Assessment<sup>d</sup></i> |
|-----------------------|------------------------------------------------------------------------------------------------------------------------------------------------------------------------------------------------------------------------------------------------------------------------------------------------------------------------------------|-------------------------------------------------------------------------------------------------|----------------------------------------|--------------------------------------------------------------|
| Acrylamide            | -Ingestion of certain foods that have been cooked and processed at high temperature<br>-Tobacco smoke<br>-Ingestion of contaminated drinking water<br>-Dermal contact with polyacrylamide products                                                                                                                                 | Major                                                                                           | 2A                                     | Lower                                                        |
| Acrylonitrile         | -Inhalation of ambient air, particularly near industrial plant manufacturing/using acrylonitrile<br>-Dermal contact with products containing acrylonitrile<br>-Tobacco smoke                                                                                                                                                       | Background                                                                                      | 2B                                     | Higher                                                       |
| Benzene               | -Inhalation of ambient air, particularly in areas with heavy vehicular traffic, gasoline stations, and industrial plants manufacturing/using benzene<br>-Ingestion of food and drinking water<br>-Tobacco smoke<br>-Dermal contact with consumer products containing benzene<br>-Use and storage of gasoline and gas-powered tools | On-road                                                                                         | 1                                      | Higher                                                       |
| Benzidine             | -General population not thought to be exposed; benzidine may only be produced for captive use in the United States.<br>-Tobacco smoke                                                                                                                                                                                              | Background                                                                                      | 1                                      | Lower                                                        |
| 1,3-Butadiene         | -Inhalation of ambient air, particularly in areas with heavy vehicular traffic and manufacturing and processing facilities<br>-Ingestion of drinking water<br>-Dermal contact directly with 1,3-butadiene or products containing this compound<br>-Tobacco smoke                                                                   | On-road                                                                                         | 1                                      | Lower                                                        |
| Carbon tetrachloride  | -Inhalation of ambient air<br>-Indoor air, particularly from building materials or products used in home<br>-Ingestion of contaminated foods and drinking water<br>-Dermal contact with carbon tetrachloride and products containing this compound<br>-Tobacco use                                                                 | Background                                                                                      | 2B                                     | Medium                                                       |
| Chloroprene           | -Inhalation of ambient air                                                                                                                                                                                                                                                                                                         | Major                                                                                           | 2B                                     | Lower                                                        |
| 1,4-Dioxane           | -Inhalation of ambient air<br>-Ingestion of drinking water<br>-Dermal contact with contaminated consumer products                                                                                                                                                                                                                  | Major                                                                                           | 2B                                     | Medium                                                       |
| Ethyl carbamate       | -Ingestion of fermented foods and alcoholic beverages<br>-Ingestion of drinking water<br>-Tobacco smoke                                                                                                                                                                                                                            | Major                                                                                           | 2A                                     | Medium                                                       |
| Ethylene dibromide    | -Inhalation of ambient air<br>-Ingestion of drinking water<br>-Tobacco smoke                                                                                                                                                                                                                                                       | Background                                                                                      | 2A                                     | Medium                                                       |
| Ethylene dichloride   | -Inhalation of ambient air<br>-Ingestion of drinking water<br>-Dermal contact with ethylene dichloride or consumer products containing this compound<br>-Tobacco smoke                                                                                                                                                             | Background                                                                                      | 2B                                     | Medium                                                       |
| Ethylene oxide        | -Inhalation of ambient air, particularly near areas of heavy vehicular traffic and industrial facilities<br>-Tobacco smoke                                                                                                                                                                                                         | Background                                                                                      | 1                                      | Higher                                                       |
| Ethylidene dichloride | -Inhalation of ambient air, particularly near source areas<br>-Ingestion of contaminated drinking water<br>-Use of consumer products that contain ethylidene dichloride                                                                                                                                                            | Major                                                                                           | 3                                      | Medium                                                       |

**Supplementary Table S1:** Select information for 24 Mammary Gland Carcinogens examined in the analysis.

| <i>Compound</i>                     | <i>Probable Routes of Human Non-Occupational Exposure<sup>a</sup></i>                                                                                                                                                                                                                                                                       | <i>Predominant Source Type for NATA-modeled Exposure among Our Study Population<sup>b</sup></i> | <i>IARC Classification<sup>c</sup></i> | <i>Overall Confidence in Exposure Assessment<sup>d</sup></i> |
|-------------------------------------|---------------------------------------------------------------------------------------------------------------------------------------------------------------------------------------------------------------------------------------------------------------------------------------------------------------------------------------------|-------------------------------------------------------------------------------------------------|----------------------------------------|--------------------------------------------------------------|
| Hydrazine                           | -Tobacco smoke<br>-Ingestion of food<br>-Dermal contact with vapors and other products containing hydrazine                                                                                                                                                                                                                                 | Major                                                                                           | 2B                                     | Lower                                                        |
| Methylene chloride                  | -Inhalation of ambient air<br>-Indoor air, particularly from consumer products<br>-Ingestion of food and drinking water<br>-Dermal contact with consumer products containing methylene chloride<br>-Tobacco smoke                                                                                                                           | Area                                                                                            | 2B                                     | Higher                                                       |
| 4,4'-Methylene bis(2-chloroaniline) | -Inhalation of ambient air, particularly near industrial plant manufacturing/using 4,4'-Methylene bis(2-chloroaniline)<br>-Dermal contact with compound in vicinity of production and manufacturing facilities                                                                                                                              | Major                                                                                           | 1                                      | Lower                                                        |
| Nitrobenzene                        | -Inhalation of ambient air<br>-Ingestion of drinking water<br>-Dermal contact<br>-Tobacco smoke                                                                                                                                                                                                                                             | Major                                                                                           | 2B                                     | Lower                                                        |
| Propylene dichloride                | -Inhalation of ambient air<br>-Ingestion of drinking water<br>-Dermal contact with this propylene dichloride and other products containing this compound<br>-Tobacco smoke                                                                                                                                                                  | Background                                                                                      | 1                                      | Lower                                                        |
| Propylene oxide                     | -Inhalation of ambient air<br>-Ingestion of contaminated food<br>-Use of consumer products<br>-Tobacco smoke                                                                                                                                                                                                                                | Major                                                                                           | 2B                                     | Higher                                                       |
| Styrene                             | -Indoor air, particularly from building materials and consumer products<br>-Ingestion of foods packaged in polystyrene<br>-Ingestion of contaminated drinking water<br>-Inhalation of ambient air, particularly near industrial sources, heavy vehicular traffic, and incineration emissions<br>-Tobacco smoke<br>-Use of consumer products | Major                                                                                           | 2B                                     | Lower                                                        |
| 2,4-Toluene diisocyanate            | -Use of consumer products containing this compound<br>-Inhalation of contaminated ambient air                                                                                                                                                                                                                                               | Major                                                                                           | 2B                                     | Lower                                                        |
| o-Toluidine                         | -Ingestion of food<br>-Tobacco smoke<br>-Dermal contact with o-toluidine or other products containing this compound                                                                                                                                                                                                                         | Major                                                                                           | 1                                      | Lower                                                        |
| Vinyl chloride                      | -Inhalation of ambient air, particularly near industrial sources<br>-Ingestion of food and drinking water<br>-Tobacco smoke                                                                                                                                                                                                                 | Major                                                                                           | 1                                      | Medium                                                       |
| Vinylidene chloride                 | -Inhalation of ambient air, particularly near industrial sources<br>-Ingestion of food and drinking water<br>-Dermal contact with vinylidene chloride or other products containing this compound                                                                                                                                            | Major                                                                                           | 3                                      | Medium                                                       |

<sup>a</sup>Abstracted from the *Hazardous Substances Database* (<http://toxnet.nlm.nih.gov/newtoxnet/hsdb.htm>) and the US EPA Air Toxics Web Site *Health Effects Notebook for Hazardous Air Pollutants*

<sup>b</sup>See NATA glossary of terms (<http://www.epa.gov/ttn/atw/nata2002/gloss.html>)

<sup>c</sup>Obtained from Agents Classified by the *IARC Monographs*, Volumes 1-11 (<http://monographs.iarc.fr/ENG/Classification/ClassificationsGroupOrder.pdf>)

<sup>d</sup>Provided by US EPA as part of NATA documentation (<http://www.epa.gov/ttn/atw/nata2002/02pdfs/2002polls.pdf>)
